# Supplementary material for: Conserved Role of Heterotrimeric G Proteins in Plant Defense and Cell Death Progression
Source: MDPI journal article supplement (doi:10.3390/genes15010115), 2024-01-18

## Supplementary data

**Table S1. Primers used for amplification and cloning of G-protein genes.**

| Primer Name           | Sequence                                                      |
|-----------------------|---------------------------------------------------------------|
| AGB1 Forward (XbaI)   | TCTAGAATGGTGAGCGGCTGGCGGCTGTTCAAGAAG<br>ATTAGCATGTCTGTCTCCGAG |
| AGB1 Reverse (KpnI)   | TGGTACCTCAAATCACTCTCCTGTGTC                                   |
| AGG1 Forward (XbaI)   | TCTAGAATGGTGAGCGGCTGGCGGCTGTTCAAGAAG<br>ATTAGCATGGGAGAGGAACT  |
| AGG1 Reverse (KpnI)   | TGGTACCTCAAAGTATTAAGCATCTGCAGCCT                              |
| SlGB1 Forward (XbaI)  | TTTCTAGACCATGGCAGTTGCGGAGCTGAAAGA                             |
| SlGB1 Reverse (KpnI)  | AAGGTACCTCAGATCACACTTCTGTGTCCT                                |
| SlGGA1 Forward (XbaI) | TTTCTAGACCATGGAATCAGAGAGCTCAGAACA                             |
| SlGGA1 Reverse (KpnI) | AAGGTACCTCACAATATCCAGCATCTGCAAC                               |
| XLG2 Forward (XbaI)   | GCTCTAGAATGGCTGCAGTTATAAGAAAGTTATTAC                          |
| XLG2 Reverse (KpnI)   | GGTACCTCAAGAGGACGAGCTG                                        |

**Table S2. Primers used for RT-qPCR.**

|          |                             |
|----------|-----------------------------|
| SAND-F   | GTTGGGTCACACCAGATTTTG       |
| SAND-R   | GCTCCTTGCAAGAACACTTCA       |
| RT-PR1-F | AAGAGGCAACTGCAGACTCA        |
| RT-PR1-R | TCTCGCTAACCCACATGTTC        |
| RT-PR2-F | GATTCTTCTCAGCCTTGTAATAGCTTC |
| RT-PR2-R | GATGAGCTCGATGTCAGAGCCAC     |
| RT-PR3-F | ACGGAAGAGGACCAATGCAA        |
| RT-PR3-R | GAGCAGTCATCCAGAACCAAATC     |
| RT-PR4-F | ATCATACACAGTGGCTACGGTG      |
| RT-PR4-R | CTTCCCAACAATTGCTCTGAC       |
| RT-PR5-F | TCGGCGATGGAGGATTTGAA        |
| RT-PR5-R | AGCCAGAGTGACGGGAGGAAC       |

**Figure S1. Complete maps of expression vectors used in this study**

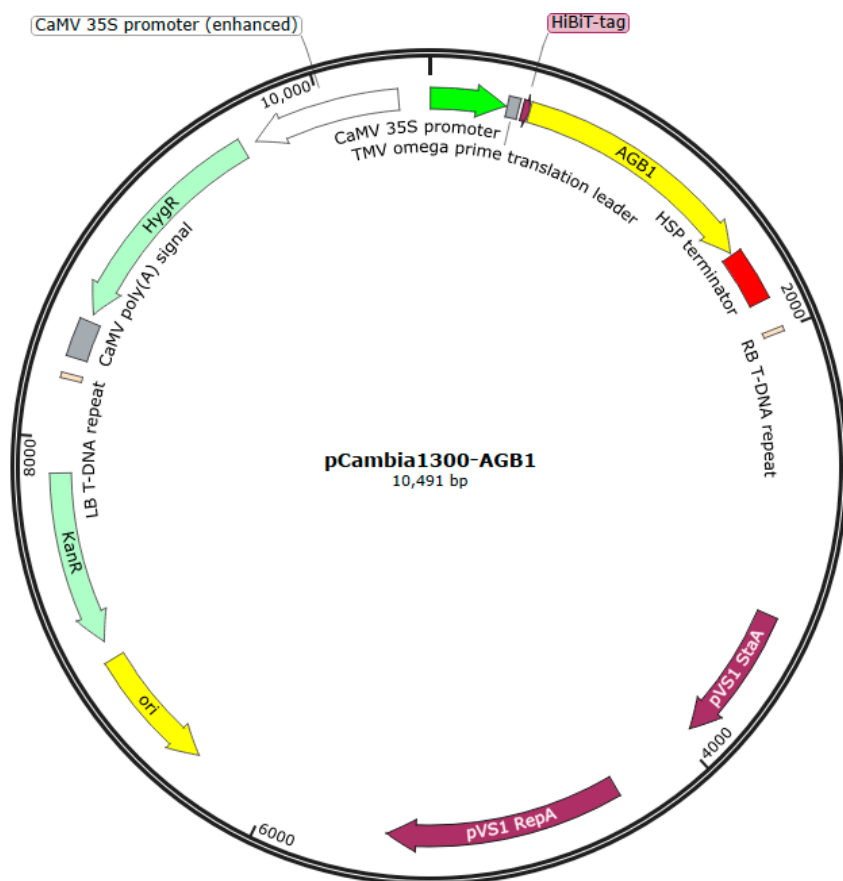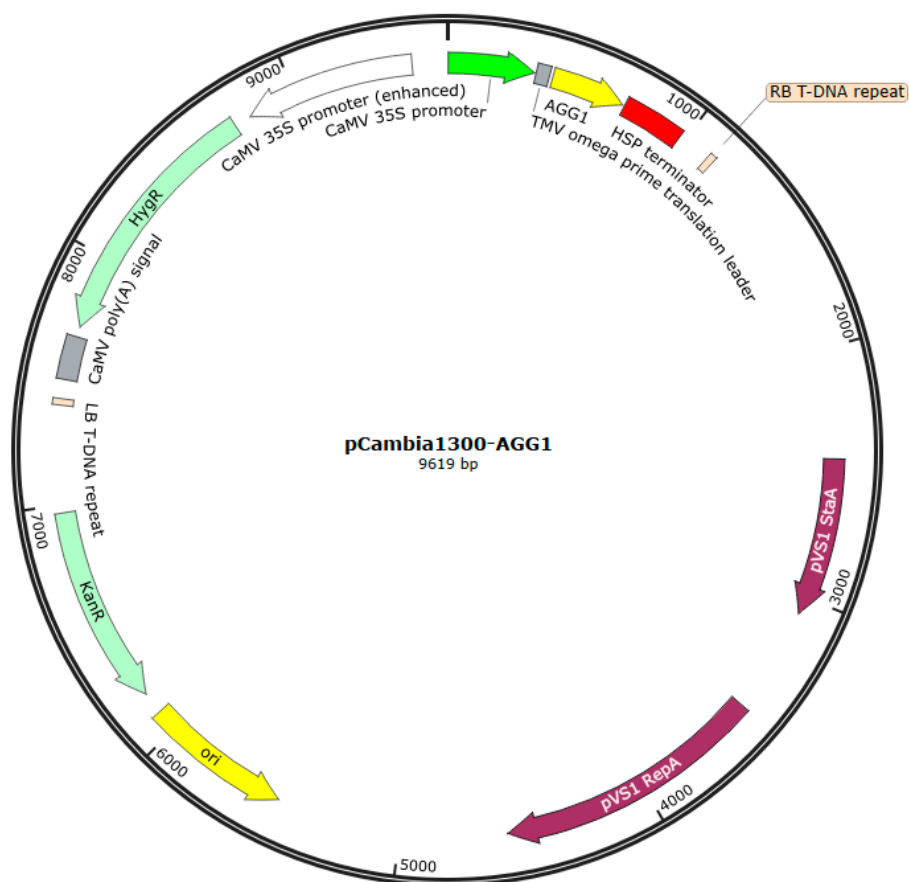

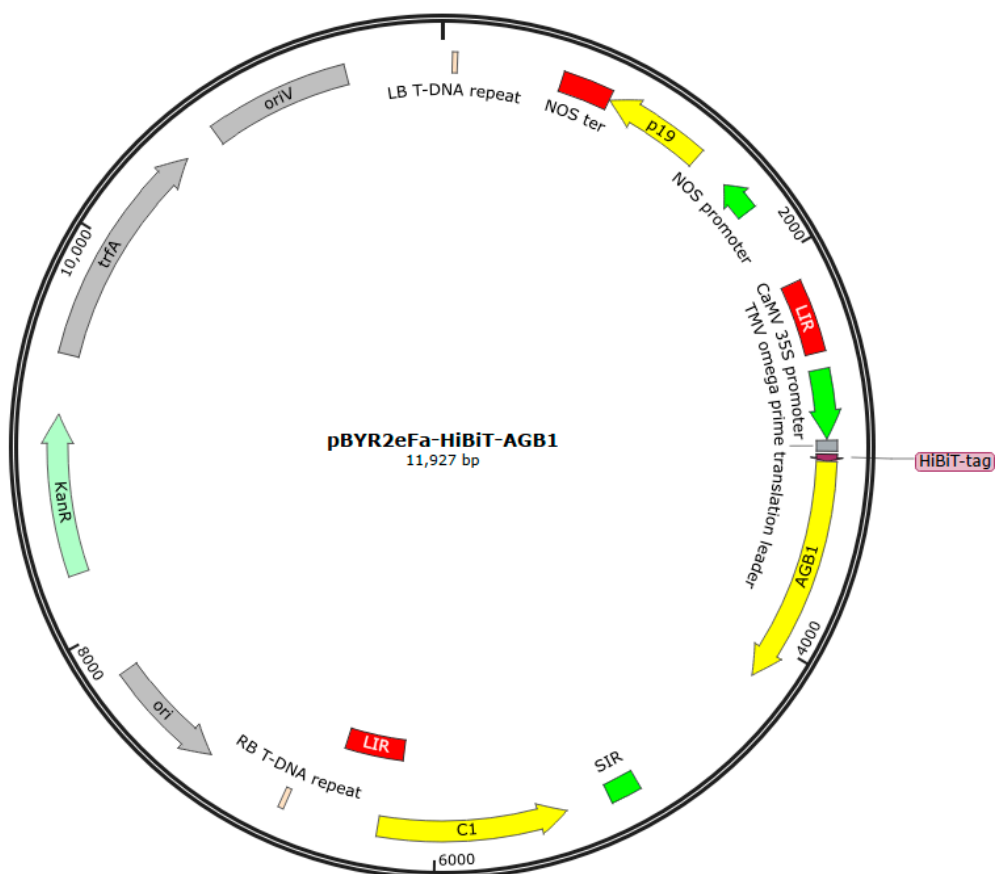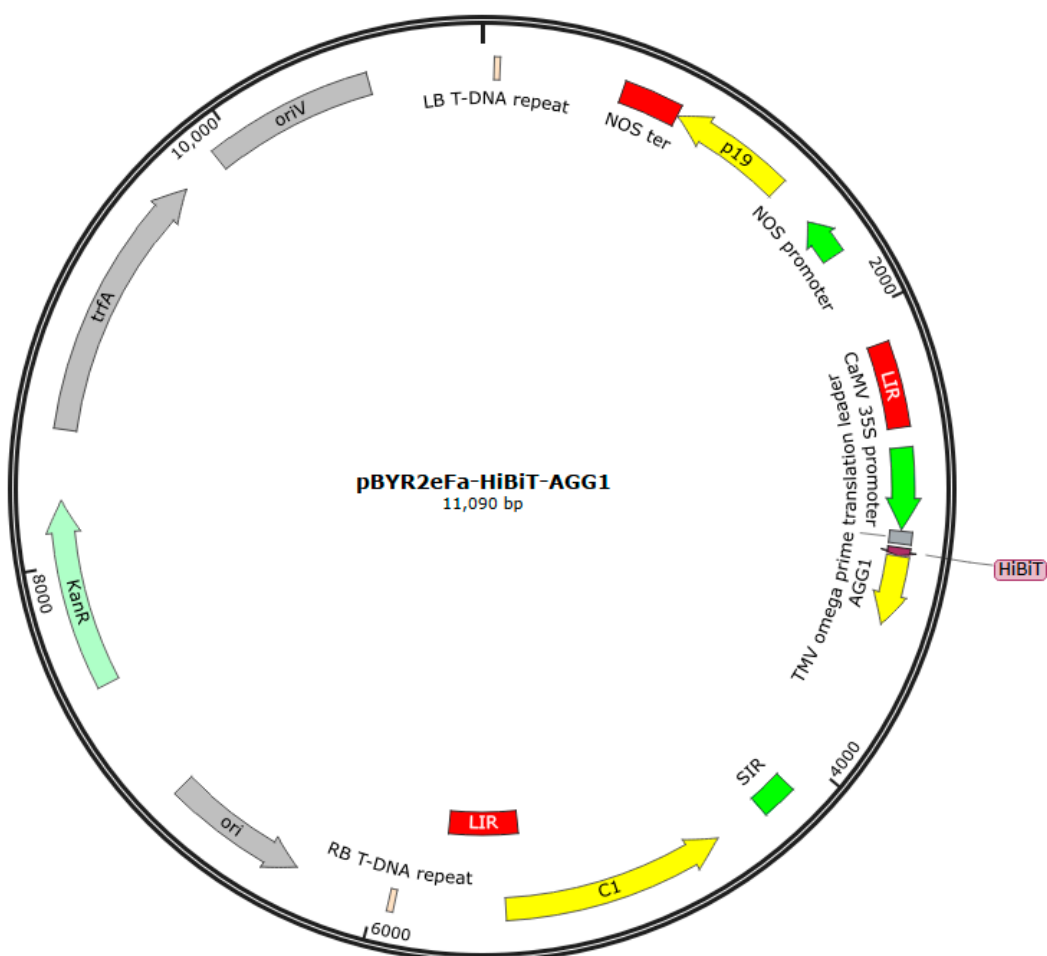

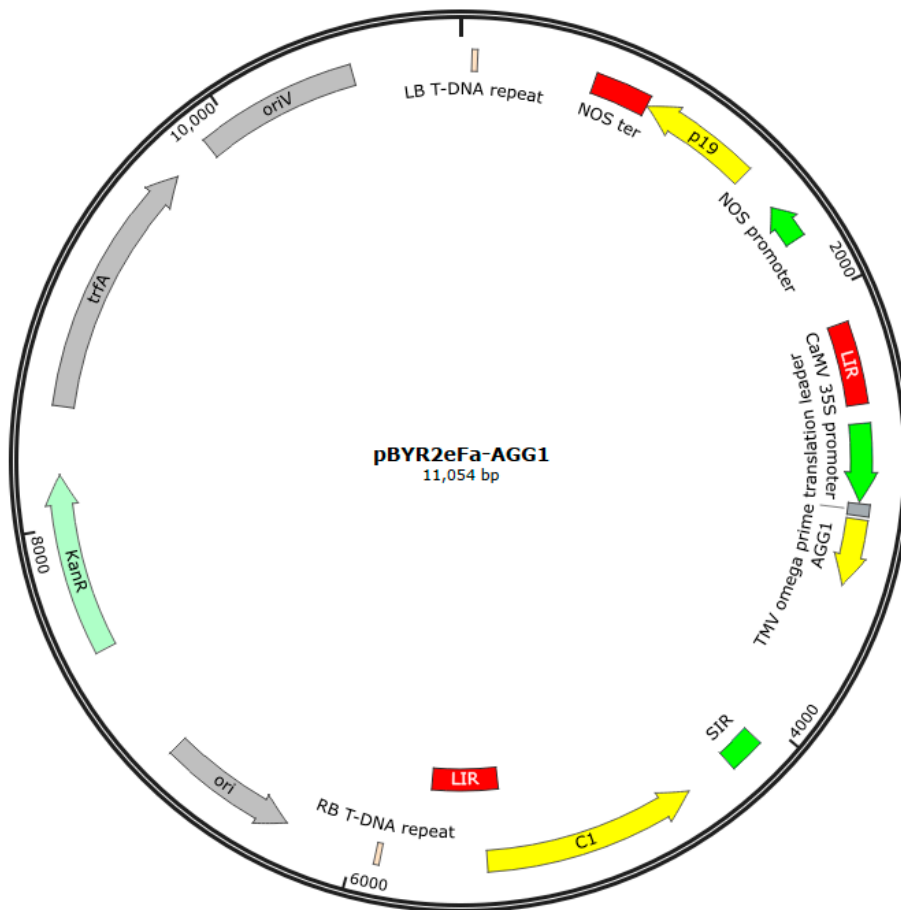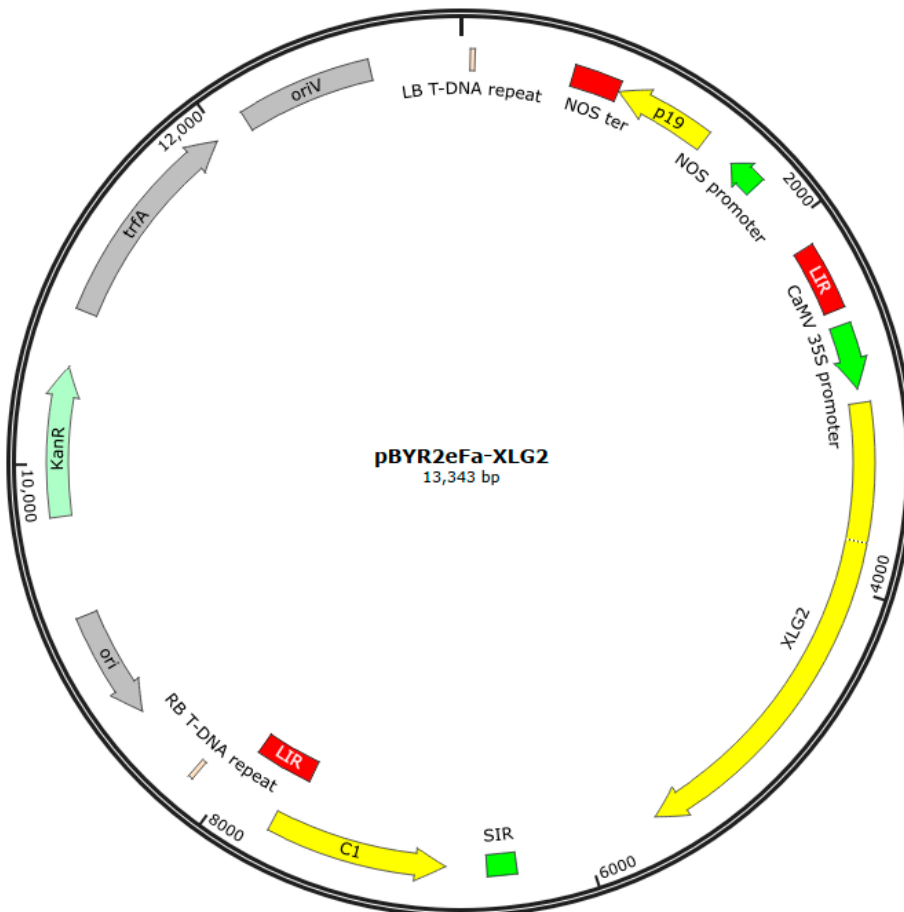

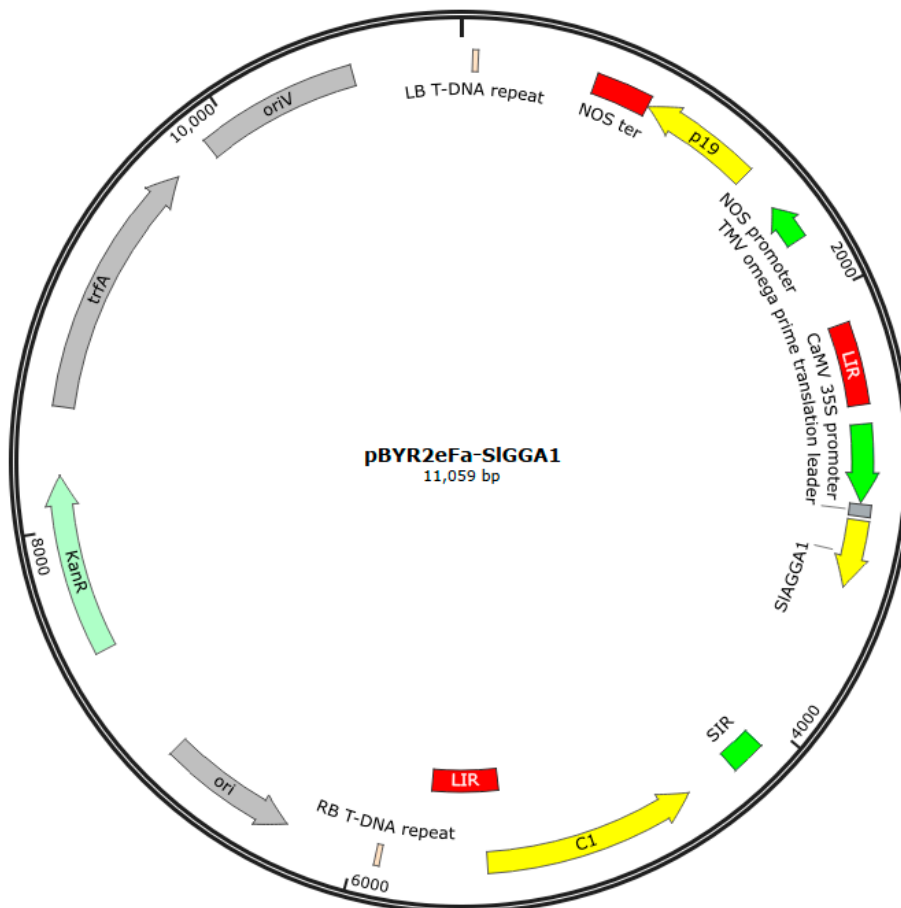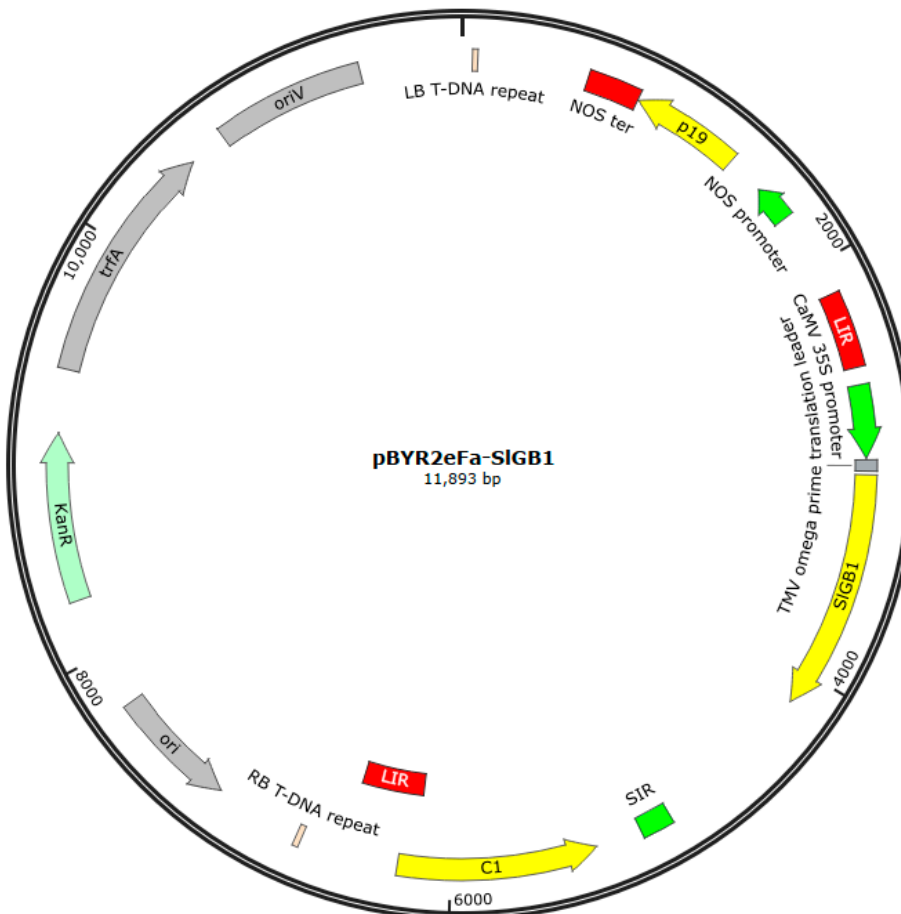

Supplement: s1 [file s1]
